# Supplementary material for: The Influence of the Blend Ratio in PA6/PA66/MWCNT Blend Composites on the Electrical and Thermal Properties
Source: PubMed Central journal article supplement (PMC6401933; doi:10.3390/polym11010122), 2019-01-11
Supplement: polymers-11-00122-s001.pdf [file polymers-11-00122-s001.pdf]

Article

# The Influence of the Blend Ratio in PA6/PA66/MWCNT Blend Composites on the Electrical and Thermal Properties

Beate Krause, Lisa Kroschwald and Petra Pötschke

Supplementary Materials

Transmission electron microscopy (TEM) on PA6/PA66/MWCNT blends

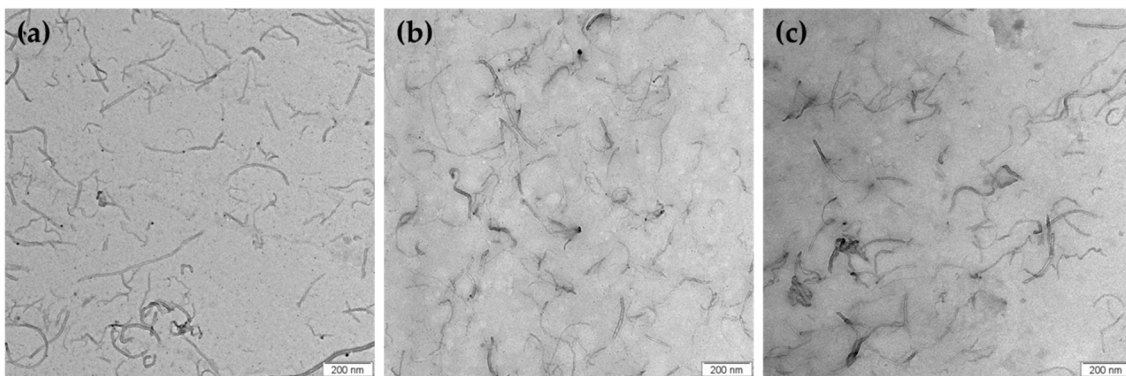

**Figure S1.** TEM micrograph of (a) PA6 + 1 wt % MWCNT, (b) PA66 + 1 wt % MWCNT, and (c) PA66/PA6 40/60 + 1 wt % MWCNT (thin section, Zeiss Libra 120).

Differential scanning calorimetry (DSC)

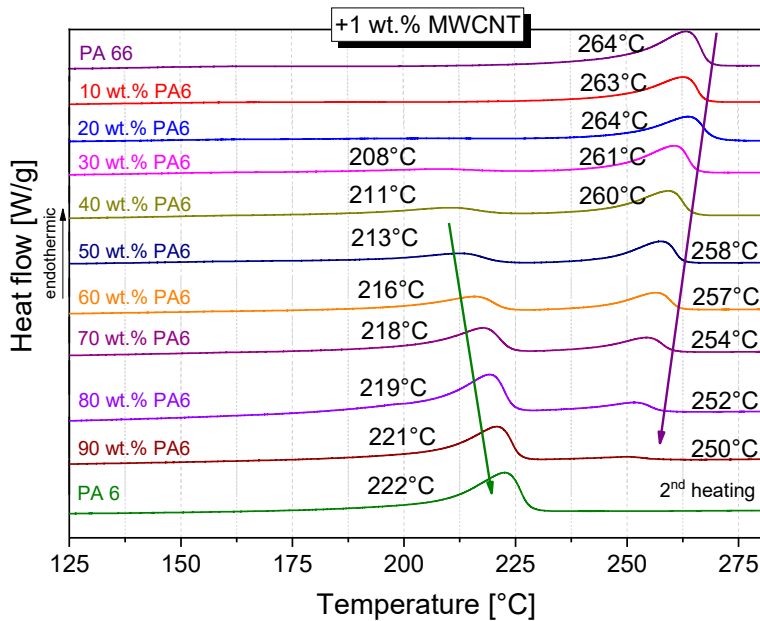

**Figure S2.** Melting behavior of PA66/PA6/1 wt % MWCNT composite including melting temperature  $T_m$  (2<sup>nd</sup> heating).

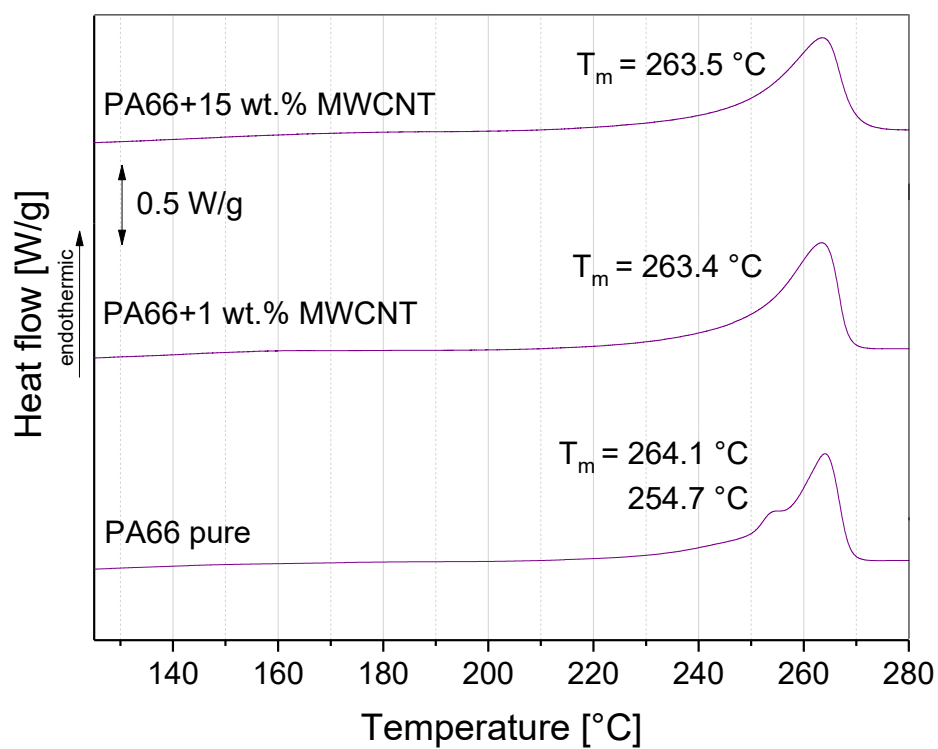

**Figure S3.** Melting behavior of PA66, PA66/1 wt % MWCNT (masterbatch dilution), and PA66/15 wt % MWCNT (masterbatch Plasticity™ PA1501) (2<sup>nd</sup> heating).

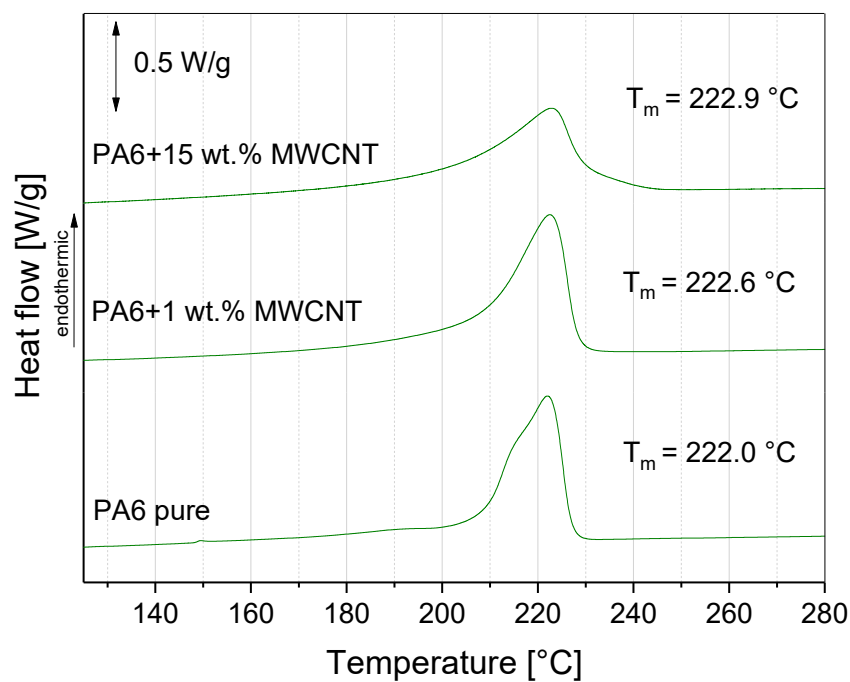

**Figure S4.** Melting behavior of PA6, PA6/1 wt % MWCNT (masterbatch dilution), and PA6/15 wt % MWCNT (masterbatch Plasticity™ PA1503) (2<sup>nd</sup> heating).

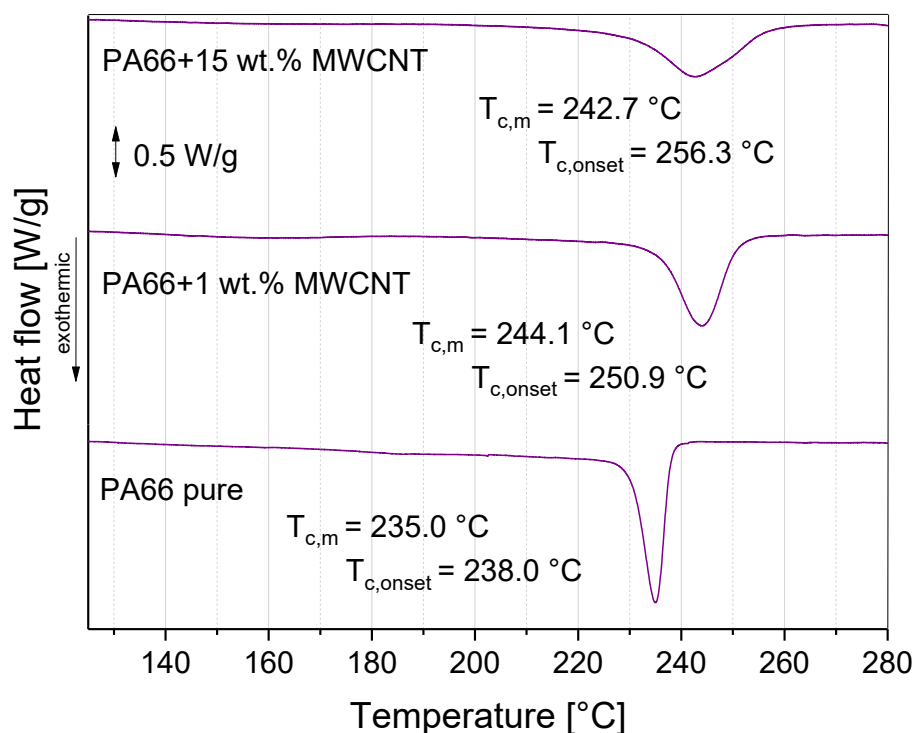

**Figure S5.** Crystallization behavior of PA66, PA66/1 wt % MWCNT (masterbatch dilution), and PA66/15 wt % MWCNT (masterbatch Plasticity<sup>TM</sup> PA1501).

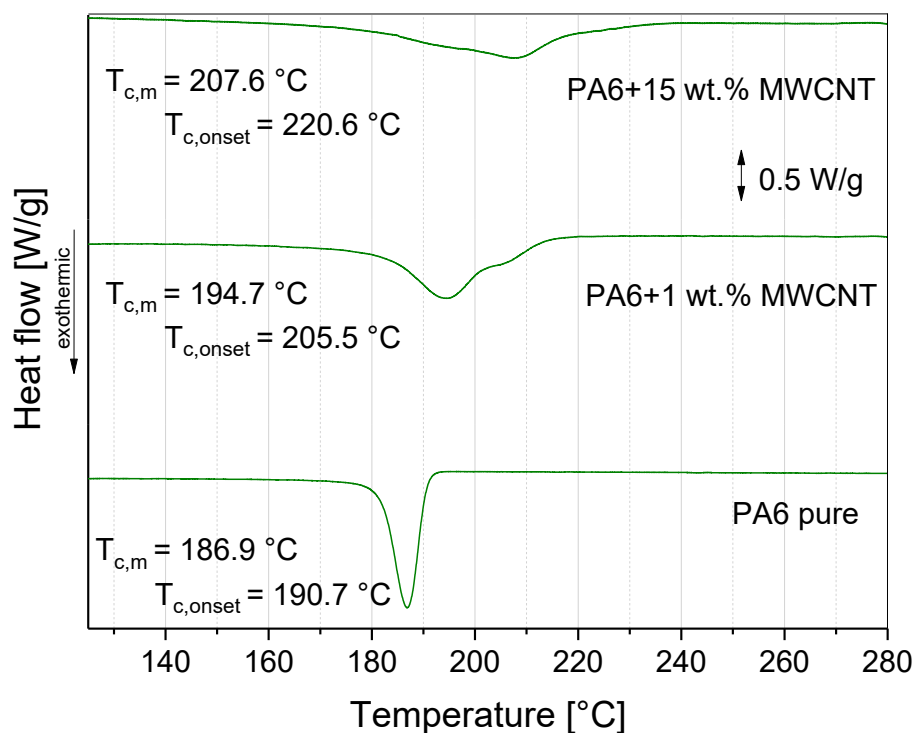

**Figure S6.** Crystallization behavior of PA6, PA6/1 wt % MWCNT (masterbatch dilution), and PA6/15 wt % MWCNT (masterbatch Plasticity<sup>TM</sup> PA1503).

**Table S1.** Melting temperatures  $\Delta H_m$  of PA6 and PA66 in PA66/PA6 blends filled with 0 or 1 wt % MWCNT.

| Blend composition | $\Delta H_m$ [°C] PA6 |              | $\Delta H_m$ [°C] PA66 |              |
|-------------------|-----------------------|--------------|------------------------|--------------|
|                   | @ 0 wt.% CNT          | @ 1 wt.% CNT | @ 0 wt.% CNT           | @ 1 wt.% CNT |
| PA66              | -                     | -            | 85.0                   | 83.2         |
| PA66/PA6 90/10    | -                     | -            | 78.4                   | 78.5         |
| PA66/PA6 80/20    | -                     | -            | 75.7                   | 82.4         |
| PA66/PA6 70/30    | 13.2                  | 19.8         | 53.1                   | 55.2         |
| PA66/PA6 60/40    | 26.3                  | 35.4         | 44.9                   | 53.8         |
| PA66/PA6 50/50    | 43.6                  | 32.1         | 37.1                   | 36.3         |
| PA66/PA6 40/60    | 46.5                  | 42.1         | 30.9                   | 31.7         |
| PA66/PA6 30/70    | 49.8                  | 56.2         | 14.2                   | 24.1         |
| PA66/PA6 20/80    | 58.7                  | 76.7         | 18.6                   | 14.4         |
| PA66/PA6 10/90    | 67.4                  | 72.1         | 7.0                    | 6.2          |
| PA6               | 67.7                  | 80.6         | -                      | -            |

**Rheological measurements**

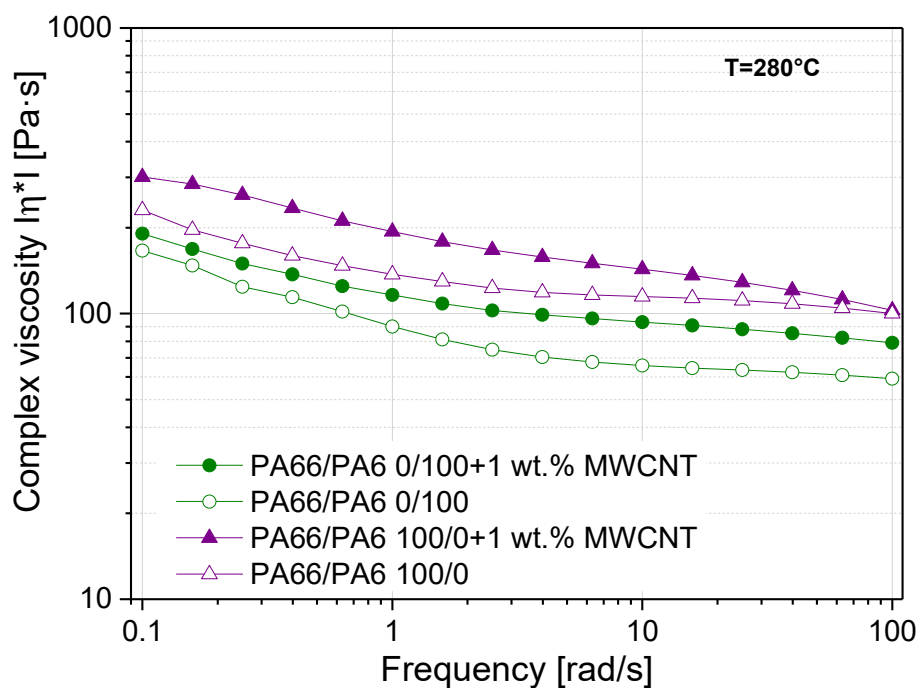

**Figure S7.** Complex viscosity of PA6 and PA66 and their composites filled with 1 wt % MWCNT.

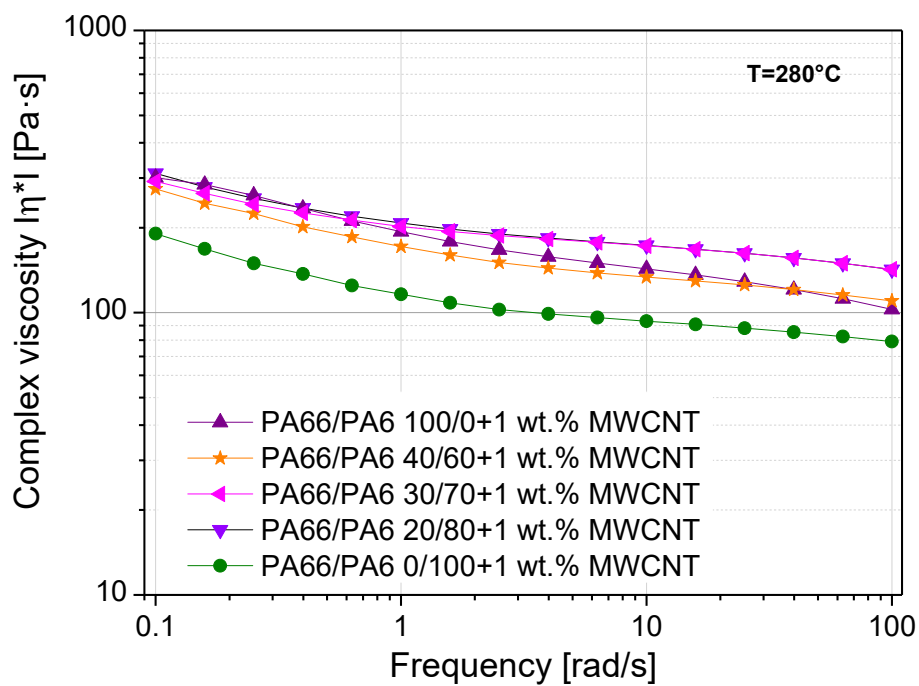

Figure S8. Complex viscosity of PA66/PA6/1 wt % MWCNT blends.
